# Supplementary material for: NADPH Oxidase 4 Signaling in a Ventilator-Induced Lung Injury Mouse Model
Source: Research Square preprint supplement (doi:10.21203/rs.3.rs-104053/v2), 2021-08-23

- **Supplementary data**

**NADPH oxidase 4 signaling in a ventilator-induced lung injury mouse model**

Sang Hoon Lee, Mi Hwa Shin, Ah Young Leem, Su Hwan Lee, Kyung Soo Chung, Young Sam Kim, Moo Suk Park

Division of Pulmonology, Department of Internal Medicine, Institute of Chest Diseases, Severance Hospital, Yonsei University College of Medicine, Seoul, Republic of Korea

**Fig S1.** **Time table for NOX4 inhibitor treatment in the high tidal volume group**

In the VILI model, mice were tracheostomized, and the ventilator was maintained for 5 h in the supine position with 24 mL/kg volume, 0 cmH2O PEEP, 100/min respiration rate, and 0.21 inspired oxygen fraction.

**
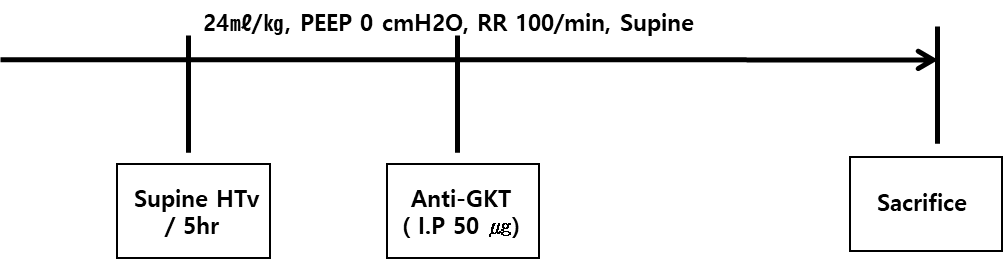
**

**Fig S2. Potential mechanisms by which NOX4 inhibition attenuates VILI.** Our study suggests that NOX4 inhibition decreases VILI through EphA2, PI3K-r, and Nrf2 signaling.

VILI, ventilator-induced lung injury


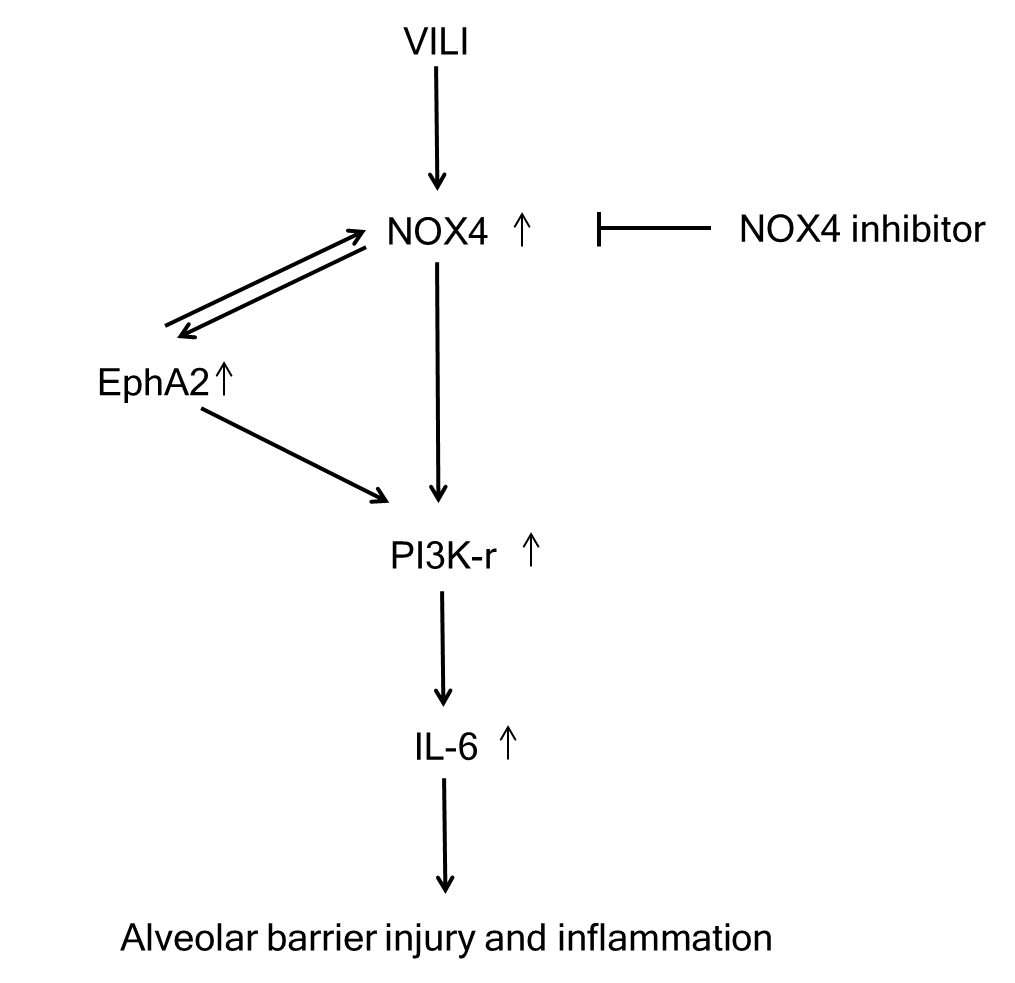

Supplement: Supplementary file 1 [file b010af794b28ee413e9e0645.docx]
